# Supplementary material
Source: publisher figshare collection journal article supplement (https://karger.figshare.com/ndownloader/files/8708065)
Supplement: Supplementary file 1 [file 8708065]

Online supplement ( eTable)

**National Stroke Project Stroke Scale Scoring**

| QUESTION                                                                                                                        | SYNONYMS                                                                                                                                                                                                                                                                                                                                                                                                                                                                                                                                                                                                                                                                                                                                                                                                                                                                                                                                                                                                 | EXCLUSIONS                                                                                                              |
|---------------------------------------------------------------------------------------------------------------------------------|----------------------------------------------------------------------------------------------------------------------------------------------------------------------------------------------------------------------------------------------------------------------------------------------------------------------------------------------------------------------------------------------------------------------------------------------------------------------------------------------------------------------------------------------------------------------------------------------------------------------------------------------------------------------------------------------------------------------------------------------------------------------------------------------------------------------------------------------------------------------------------------------------------------------------------------------------------------------------------------------------------|-------------------------------------------------------------------------------------------------------------------------|
| <p><b>VISUAL</b></p> <p>Did the patient experience a new or acute visual deficit or a change in an existing visual deficit?</p> | <p>Achromatopsia<br/> Amaurosis fugax<br/> Any change in normal visual status<br/> Balints's syndrome<br/> Binocular visual loss<br/> Blurred vision<br/> Cortical blindness<br/> Deviation of eyes<br/> Diplopia<br/> Double vision<br/> Dysconjugate gaze<br/> Field cut<br/> Fixed gaze<br/> Forced gaze deviation<br/> Hemianopia<br/> Gaze nystagmus<br/> Hemianopsia<br/> Homonomous scotoma<br/> Impaired vision<br/> Impaired visual acuity<br/> Inferior, superior, right or left quadrantanopsia<br/> Lateral gaze<br/> Monocular visual loss<br/> Obligate gaze deviation<br/> Optic ataxia<br/> Palinopsia<br/> Right or left 3rd cranial nerve palsy<br/> Right or left gaze preference<br/> Right or left homonomous hemianopia<br/> Transient monocular visual loss (TMV)<br/> Unusual disturbance in vision<br/> Visual field cut<br/> Visual field deficit<br/> Visual hallucinations<br/> Visual loss of left or right eye<br/> Visual loss of part of one eye<br/> Visual neglect</p> | <p>Physical findings present prior to the acute event or present for greater than seven days prior to the admission</p> |
|                                                                                                                                 |                                                                                                                                                                                                                                                                                                                                                                                                                                                                                                                                                                                                                                                                                                                                                                                                                                                                                                                                                                                                          |                                                                                                                         |

|                                                                                                                                 |                                                                                                                                                                                                                                                                                                                                                                                                                                                                                                                                                                                                                                                                                                                                                                                                                                                                                                                      |                                                                                                                                            |
|---------------------------------------------------------------------------------------------------------------------------------|----------------------------------------------------------------------------------------------------------------------------------------------------------------------------------------------------------------------------------------------------------------------------------------------------------------------------------------------------------------------------------------------------------------------------------------------------------------------------------------------------------------------------------------------------------------------------------------------------------------------------------------------------------------------------------------------------------------------------------------------------------------------------------------------------------------------------------------------------------------------------------------------------------------------|--------------------------------------------------------------------------------------------------------------------------------------------|
| <p><b>SPEECH</b></p> <p>Did the patient experience a new or acute speech deficit or a change in an existing speech deficit?</p> | <p>Anarthria/speechless<br/> Aphasia<br/> -Brocca's<br/> -Conduction<br/> -Expressive<br/> -Global<br/> -Motor<br/> -Receptive<br/> -Sensory<br/> -Transcortical motor<br/> -Transcortical sensory<br/> -Werneke's<br/> Anomia/difficulty naming objects<br/> Aphasia/loss of power of expression by speech<br/> Aphonia/without audible voice<br/> Difficult to understand (unless the difficulty is due to a language barrier)<br/> Difficulty speaking<br/> Dysarthria/imperfect articulation<br/> Dysmelodic<br/> Dysphasia<br/> Dysphonia<br/> Dysprosodic<br/> Echolalia<br/> Garbled speech<br/> Hypophonic<br/> Impaired speech<br/> Jargon dysphasia<br/> Mutism<br/> Nonverbal<br/> Paraphasia<br/> Scanning speech<br/> Slurred speech<br/> Speech deficit<br/> Unable to articulate<br/> Unable to speak<br/> Patient unable to respond and no observer to onset of symptoms<br/> Onset during sleep</p> | <p>-Physical findings present prior to the acute event or present for greater than 7 days prior to the admission<br/> -Rambling speech</p> |
| <p><b>MOTOR</b></p> <p>Did the patient experience a new or acute motor deficit or a change in existing motor deficit?</p>       | <p>Any change in the way the patient has been ambulating<br/> Aphagia<br/> Apparent upgoing responses seen bilaterally with withdrawal<br/> Apraxia<br/> Ataxia<br/> Babinski sign<br/> Central facial palsy</p>                                                                                                                                                                                                                                                                                                                                                                                                                                                                                                                                                                                                                                                                                                     | <p>-Physical findings present prior to the acute event or present for greater than 7 days prior to the admission<br/> -Asthenia</p>        |

|                     |                                                                                                                                                                                                                                                                                                                                                                                                                                                                                                                                                                                                                                                                                                                                                                                                                                                                                                                                                                                                                                                                                                                                                                                                                                                                               |  |
|---------------------|-------------------------------------------------------------------------------------------------------------------------------------------------------------------------------------------------------------------------------------------------------------------------------------------------------------------------------------------------------------------------------------------------------------------------------------------------------------------------------------------------------------------------------------------------------------------------------------------------------------------------------------------------------------------------------------------------------------------------------------------------------------------------------------------------------------------------------------------------------------------------------------------------------------------------------------------------------------------------------------------------------------------------------------------------------------------------------------------------------------------------------------------------------------------------------------------------------------------------------------------------------------------------------|--|
| <p><b>MOTOR</b></p> | <p>Central facial paresis<br/> Central seventh paresis<br/> Clonus<br/> Clumsiness<br/> Comatose<br/> Decerebrate posture<br/> Decorticate posture<br/> Decreased movement of the left (or right) facial asymmetry<br/> Difficulty chewing<br/> Dysphagia/difficulty swallowing<br/> Dysmetria/disturbance in power to control range of movement in muscular action<br/> Dysphagia<br/> Dystaxia<br/> Facial droop or paralysis<br/> Flaccid<br/> Flattening/asymmetry of nasolabial fold (NLF)<br/> Food pocketing<br/> Hemiparesis<br/> Hemiplegia<br/> Hoffman reflex<br/> Hyperreflexia<br/> Impaired mobility<br/> Lack of gag reflex<br/> Left or right motor deficit<br/> Loss of function or loss of motor function<br/> Loss of movement or weakness<br/> Monoparesis<br/> Monoplegia<br/> Obtunded<br/> Paralysis<br/> Paresis<br/> Pronator drift<br/> Quadriplegia<br/> Reflexes absent<br/> Reflexes are overall generalized diminished on left (or right) side<br/> Spasticity<br/> Swallowing difficulty<br/> Tendency of slight right arm pronation with drift<br/> Toes upgoing<br/> Weakness of one or more extremity, or a body side, hands, or face (may use LLE, LUE, RLE, RUE)<br/> Withdrawal upon plantar stimulation (same as positive Babinski)</p> |  |
|                     |                                                                                                                                                                                                                                                                                                                                                                                                                                                                                                                                                                                                                                                                                                                                                                                                                                                                                                                                                                                                                                                                                                                                                                                                                                                                               |  |

|                                                                                                                                    |                                                                                                                                                                                                                                                                                                                                                                                                                                                                                                                                                                                                                                                                                                                                                          |                                                                                                                                                                                                                                                                                                                                                                                                   |
|------------------------------------------------------------------------------------------------------------------------------------|----------------------------------------------------------------------------------------------------------------------------------------------------------------------------------------------------------------------------------------------------------------------------------------------------------------------------------------------------------------------------------------------------------------------------------------------------------------------------------------------------------------------------------------------------------------------------------------------------------------------------------------------------------------------------------------------------------------------------------------------------------|---------------------------------------------------------------------------------------------------------------------------------------------------------------------------------------------------------------------------------------------------------------------------------------------------------------------------------------------------------------------------------------------------|
| <p><b>SENSORY</b></p> <p>Did the patient experience a new or acute sensory deficit or a change in an existing sensory deficit?</p> | <p>Altered position sensation<br/>         Altered sensation<br/>         Altered vibratory sensation<br/>         Decrease /absence / change in vibratory sensation<br/>         Decrease in pain or temperature sensation<br/>         Felt as if the chair was tilting<br/>         Felt as if the room was spinning<br/>         Formication or sensation of the skin such as of the pricks of pins and needles, or crawling<br/>         Left or right sensory deficit<br/>         No corneal response<br/>         Numbness or tingling<br/>         Obtundation of sensorium<br/>         Paresthesia<br/>         Proprioception no significant response on the left (or right)<br/>         Unresponsive<br/>         Unresponsive to pain</p> | <p>-Physical findings present prior to the acute event or present for greater than 7 days prior to the arrival<br/>         -Dizziness<br/>         -Fuzzy headed sensation<br/>         -Head isn't connected to my body<br/>         -Legs feel like lead<br/>         -Lightheadedness<br/>         -Peripheral neuropathy<br/>         -Syncope<br/>         -Woozy<br/>         -Vertigo</p> |
|------------------------------------------------------------------------------------------------------------------------------------|----------------------------------------------------------------------------------------------------------------------------------------------------------------------------------------------------------------------------------------------------------------------------------------------------------------------------------------------------------------------------------------------------------------------------------------------------------------------------------------------------------------------------------------------------------------------------------------------------------------------------------------------------------------------------------------------------------------------------------------------------------|---------------------------------------------------------------------------------------------------------------------------------------------------------------------------------------------------------------------------------------------------------------------------------------------------------------------------------------------------------------------------------------------------|

**Any deficit within a domain results in a score of 1 for that domain**

*The NSP-SS was prepared by IFMC, the Quality Improvement Organization Support Center for the National Stroke Project, under contract with the Centers for Medicare & Medicaid Services (CMS), an agency of the U.S. Department of Health and Human Services (contract number 500-99-IA03).*
